# Supplementary material for: Identification of the Catalytic Triad of Family S46 Exopeptidases, Closely Related to Clan PA Endopeptidases
Source: PubMed Central journal article supplement — Sci Rep. 2014 Mar 6;4:4292. doi: 10.1038/srep04292 (PMC3944710; doi:10.1038/srep04292), 2014-03-06
Supplement: srep04292-s1.pdf [file srep04292-s1.pdf]

## Supporting information of " Identification of the Catalytic Triad of Family S46 Exopeptidases, Closely Related to Clan PA Endopeptidases "

Yoshiyuki Suzuki<sup>1</sup>, Yasumitsu Sakamoto<sup>2</sup>, Nobutada Tanaka<sup>3</sup>, Hirofumi Okada<sup>1</sup>, Yasushi Morikawa<sup>1</sup> & Wataru Ogasawara<sup>1</sup>

<sup>1</sup>The Department of Bioengineering, Nagaoka University of Technology, 1603-1 Kamitomioka, Nagaoka, Niigata 940-2188, Japan, <sup>2</sup>School of Pharmacy, Iwate Medical University, 2-1-1 Nishitokuta, Yahaba, Iwate 028-3694, Japan and <sup>3</sup>School of Pharmacy, Showa University, 1-5-8 Hatanodai, Shinagawa-ku, Tokyo 142-8555, Japan.

### Supplementary Figures

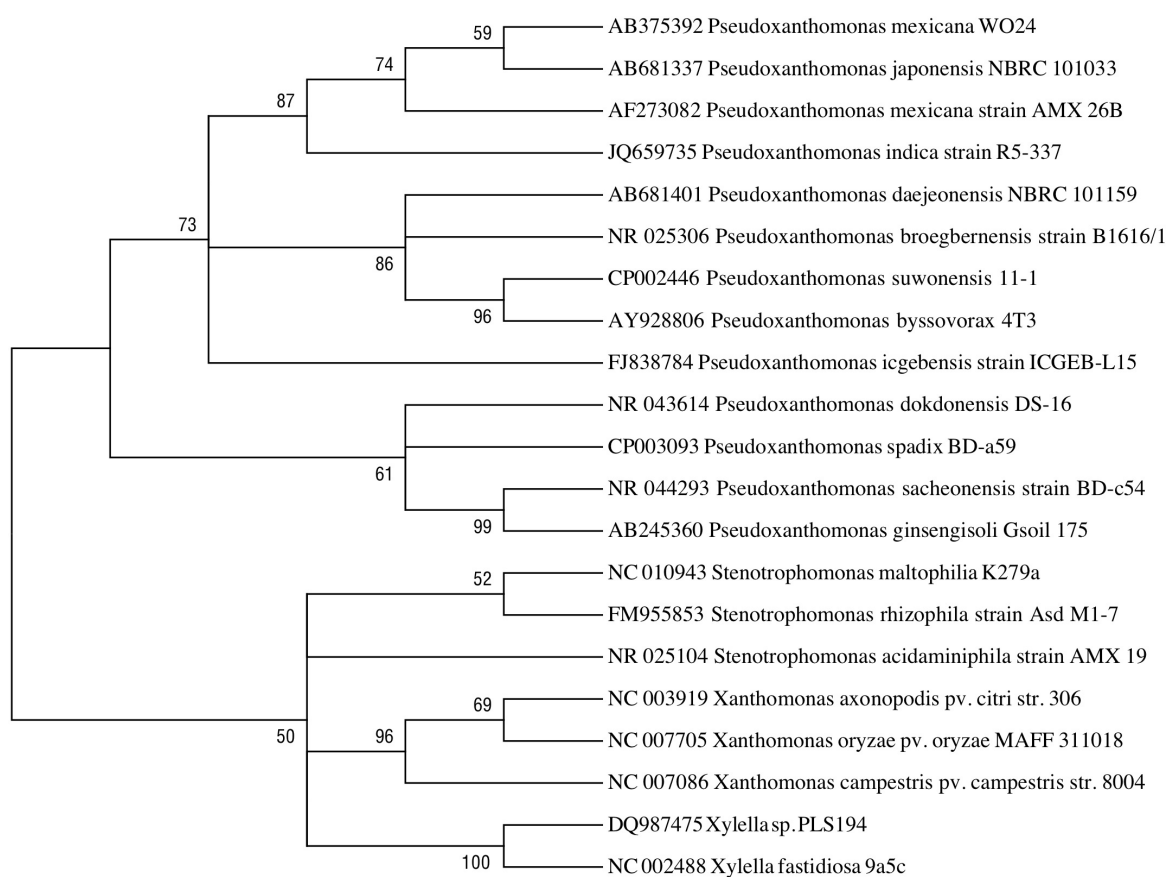

**Supplemental Figure S1. Phylogenetic tree of 16S rRNA from related species of *Pseudoxanthomonas*.** The phylogenetic tree of 16S rRNA was constructed by MUSCLE multiple sequence alignment and phylogenetic analysis by maximum likelihood. Bootstrap values above 50% are shown at branch points.

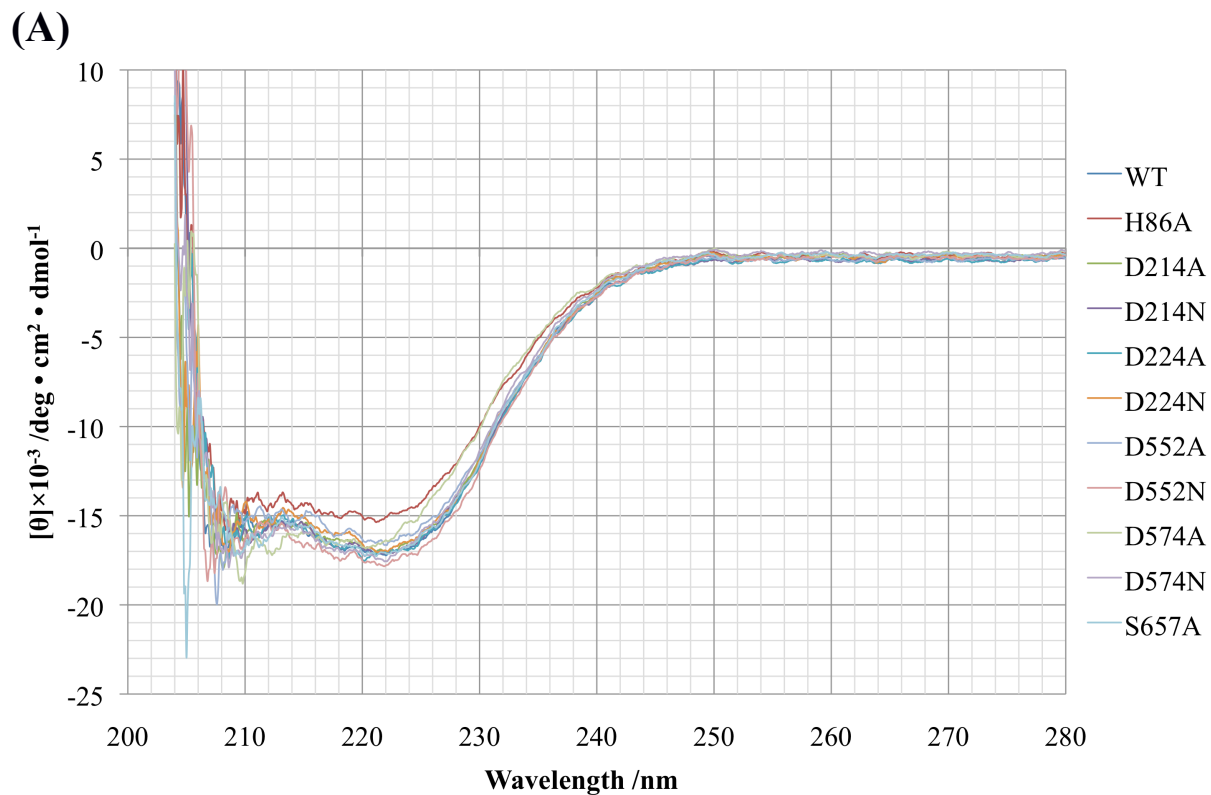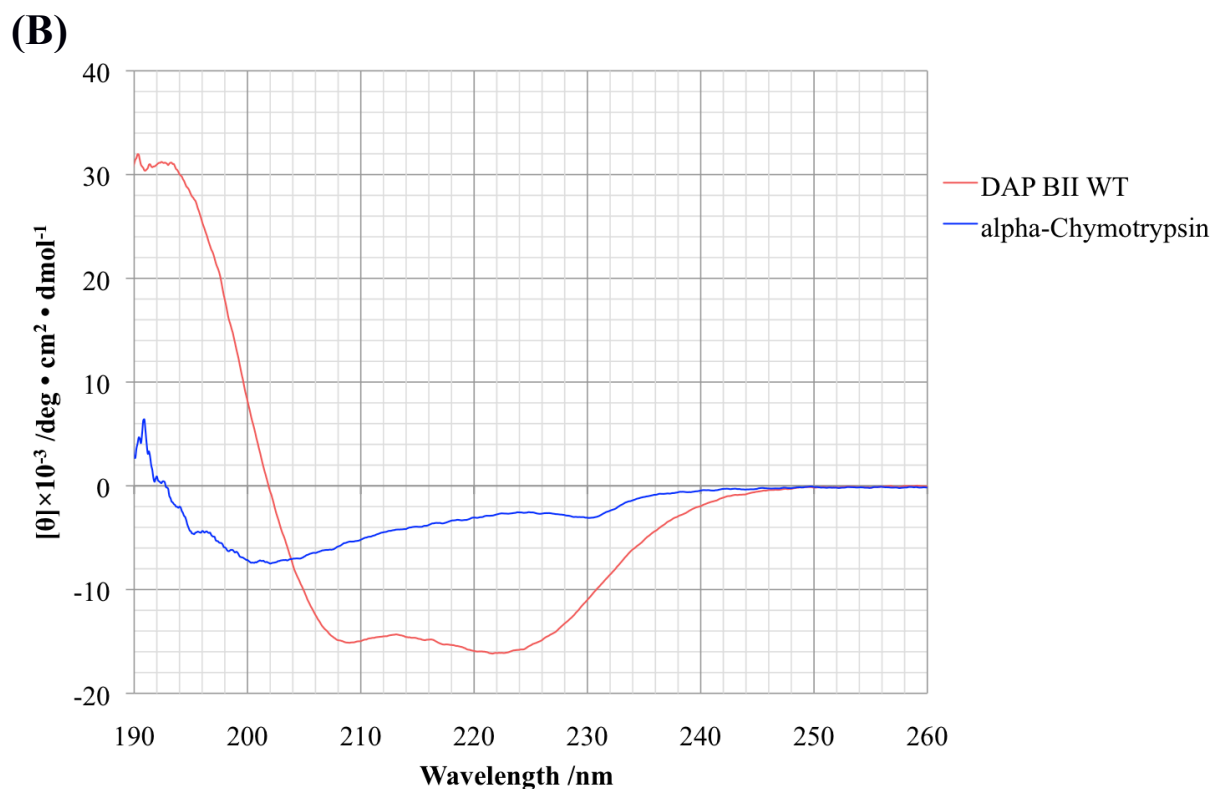

**Supplemental Figure S2. Circular dichroism spectra.** (A) Spectra of DAP BII and mutants were obtained with a circular dichroism spectrophotometer. The spectra predict an alpha-helical content of about 47% for these proteins. (B) Spectra of DAP BII wild-type and alpha-chymotrypsin (*Bos taurus*).

## Supplementary Tables

**Supplemental Table S1. DNA/DNA hybridization**

|                                                              | % homology with   |                                 |                                   |
|--------------------------------------------------------------|-------------------|---------------------------------|-----------------------------------|
|                                                              | WO24 <sup>a</sup> | <i>P. mexicana</i> <sup>a</sup> | <i>P. japonensis</i> <sup>a</sup> |
| Strain WO24 <sup>b</sup>                                     | 100               | 100                             | 59                                |
| <i>Pseudoxanthomonas mexicana</i><br>JCM11524 <sup>b</sup>   | 71                | 100                             | 59                                |
| <i>Pseudoxanthomonas japonensis</i><br>JCM11525 <sup>b</sup> | 46                | 59                              | 100                               |

<sup>a</sup> filter-bound

<sup>b</sup> labeled

**Supplemental Table S2. Morphological and physiological properties of *Pseudoxanthomonas mexicana* WO24**

| Strain                      | <i>Pseudoxanthomonas mexicana</i> WO24 |
|-----------------------------|----------------------------------------|
| Sampling place              | A manufactory of tofu                  |
| Morphology                  | Rod                                    |
| Length                      | 2.0 - 3.0 $\mu\text{m}$                |
| Width                       | 0.7 $\mu\text{m}$                      |
| Motility                    | -                                      |
| Spore formation             | -                                      |
| Gram-reaction               | -                                      |
| Oxidase                     | +                                      |
| Catalase                    | +                                      |
| Urease                      | +                                      |
| Nitrate reductase           | +                                      |
| Indole formation            | -                                      |
| Starch hydrolysis           | -                                      |
| Acid from glucose           | +                                      |
| Oxidative-fermentative test | +                                      |
| Growth temperature          | Growth between 12 - 42 °C              |
| GC content                  | 67.9 mol%                              |

**Supplemental Table S3. Primers used in this study**

| Mutation                                              | Primer sequences (5'→3')        |                              |
|-------------------------------------------------------|---------------------------------|------------------------------|
|                                                       | Front                           | Reverse                      |
| For Mutan-Super Express Km (5' end is phosphorylated) |                                 |                              |
| <b>pK8b2-SacI</b>                                     | GCCGtCCAGAgCtCCCAGG             |                              |
| <b>pK8b3-SacI</b>                                     | AGGCCGaGCtcGtCGCGCC             |                              |
| <b>1stMet-NdeI</b>                                    | AGGAAACACATAAAcatATGCGCCACCCCGC |                              |
| For PrimeSTAR Mutagenesis Basal Kit                   |                                 |                              |
| <b>H86A</b>                                           | CAACCATgcCTGCGCCTATGGCGCCAT     | GCGCAGgcATGGTTGGTGACCACCAG   |
| <b>S657A</b>                                          | CGGCAACgCCGGTTCGCCGGTGCTC       | GAACCGGcGTTGCCGCCGGTGATGTCC  |
| <b>D195A</b>                                          | ATCAAGGcCGTGCGCCTGGCCTACG       | GCGCACGgCCTTGATCTCCAGGTTCT   |
| <b>D214A</b>                                          | GACATCGcCAACTGGATGTGGCCGCG      | CCAGTTGgCGATGTGCGCCGCCGAACT  |
| <b>D224A</b>                                          | CGGCGcCTTCGCGTCTACCGCGC         | AACCGGAAGgCGCCGGTGTGGCGC     |
| <b>D522A</b>                                          | AGCAACGcTCCGGCCATCCAGTATGCG     | GGCCGGAgCGTTGCTGGCTTCGAAC    |
| <b>D574A</b>                                          | TATCCCGcTGCCAACCTGTCGCTGC       | GTTGGCAgCGGGATAGACGAACTCGC   |
| <b>D195N</b>                                          | ATCAAGaACGTGCGCCTGGCCTACG       | GCGCACGTtCTTGATCTCCAGGTTCTTG |
| <b>D214N</b>                                          | CGACATCaACAACCTGGATGTGGCCGC     | CAGTTGTtGATGTGCGCCGCCGAACTTG |
| <b>D224N</b>                                          | CACCGGCaACTTCGCGTCTACCGCGCC     | GCGAAGTtGCCGGTGTGGCGCGGCCT   |
| <b>D522N</b>                                          | CAGCAACaATCCGGCCATCCAGTATGC     | GCCGGATtGTTGCTGGCTTCGAACGC   |
| <b>D574N</b>                                          | CTATCCCaATGCCAACCTGTCGCTGC      | TTGGCATtGGGATAGACGAACTCGCCC  |
